# Supplementary material
Source: PubMed Central journal article supplement (PMC2845404)
Supplement: tpc.109.066944_1.pdf [file tpc.109.066944_1.pdf]

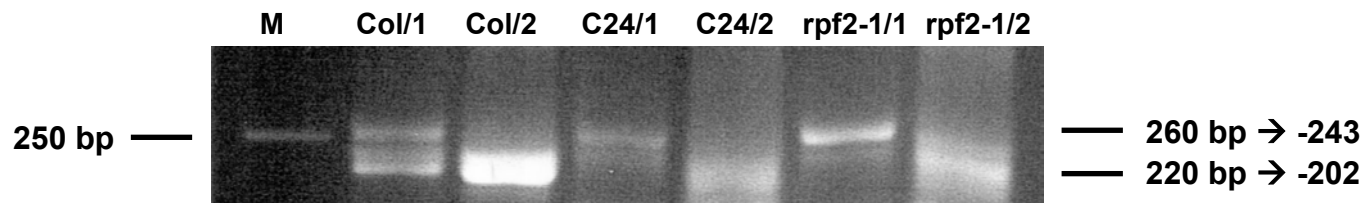

**Supplemental Figure S1:** Detection of the -202 5' end of the *nad9* mRNA in Col, C24 and *rpf2-1*. CR-RT-PCR was performed with primers Atnad9-3 and Atnad9-7. In Col, 260-bp and 220-bp products indicated the presence of the -243 and the -202 5' ends, respectively. In C24 and *rpf2-1*, the 260-bp products detected the -243 5' end, while no 220-bp product was seen. Products of the first amplification reactions in a size range of about 220 bp were recovered from the gel and used as template for a second PCR analysis under identical conditions. In these reactions 220-bp products were also amplified in C24 and *rpf2-1* indicating that minor amounts of the *nad9* transcript with -202 5' end are also present in C24 and *rpf2-1* (lanes Col/2, C24/2 and *rpf2-1/2*).

**A**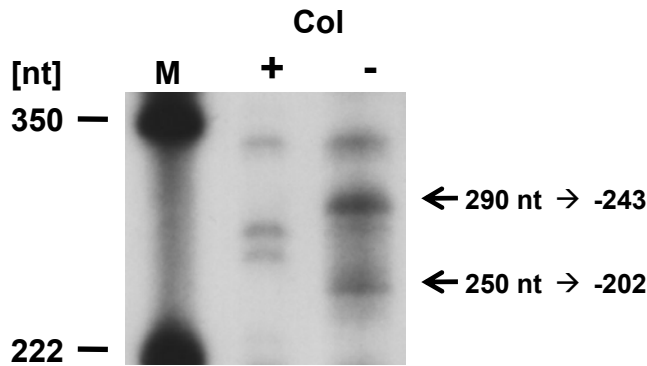**B**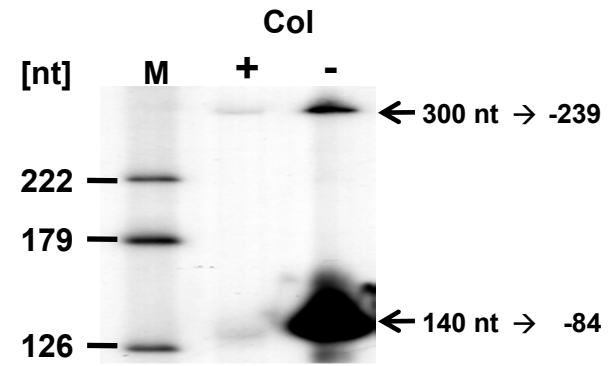

**Supplemental Figure S2:** Primer extension analysis of *nad9* (A) and *atp9* (B) transcripts from untreated (-) and Terminator<sup>TM</sup> exonuclease-treated (+) mitochondrial RNA. *nad9* mRNAs with -243 and -202 5' ends were completely degraded by the Terminator<sup>TM</sup> exonuclease. This demonstrates that these 5' termini derived from posttranscriptional processing. Two extension products of about 270 and 280 nucleotides are barely or not detectable before the treatment of the RNA and are not related to the -243 and -202 5' termini of *nad9* transcripts. In a control experiment a low abundant *atp9* 5' end originating from transcription initiation (-239, Kühn et al., 2005) was still detectable after Terminator<sup>TM</sup> exonuclease treatment, while the highly abundant mRNA with the processed 5' extremity at position -84 was almost completely digested. Sizes of the primer extension products are given in nucleotides (nt).

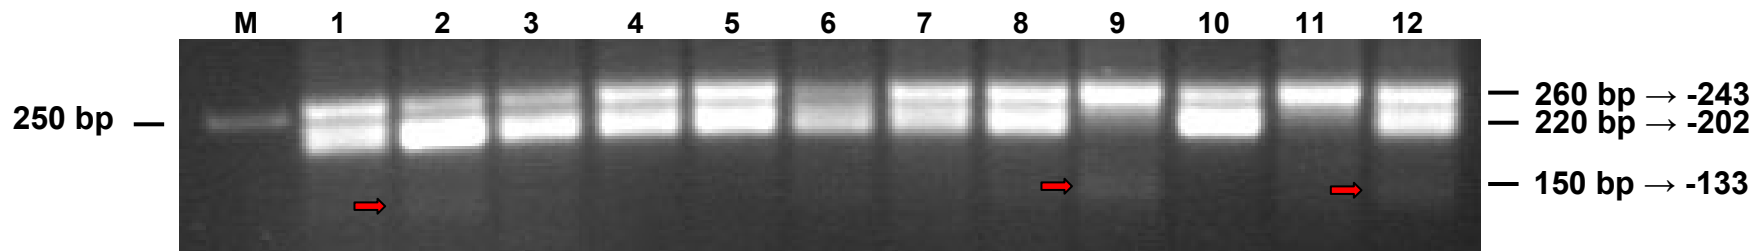

**1-6: Col x C24 4-1 to 4-6**  
**7-12: C24 x Col 4-1 to 4-6**

**Supplemental Figure S3:** Phenotyping of *nad9* mRNA ends in F<sub>2</sub> plants obtained from reciprocal crosses between Col x C24. CR-RT-PCR products amplified from cDNA generated with primer Atnad9-1. PCR products of 260/220 and 150 bp represent mRNAs with 5' ends at -243/-202 and -133, respectively. Primers Atnad9-3 and Atnad9-7 were used for amplification. PCR products were exemplarily shown for 12 plants. Two plants show the recessive C24 phenotype (lanes 9 and 11) i.e. the absence of the 220 bp product after a single round of PCR. Ten plants show the dominant Col phenotype indicated by the 260 and 220-bp products. Red arrows mark the 150-bp product with the -133 5' end, which is inherited independently from the generation of the -202 5' end.

## Chr 1

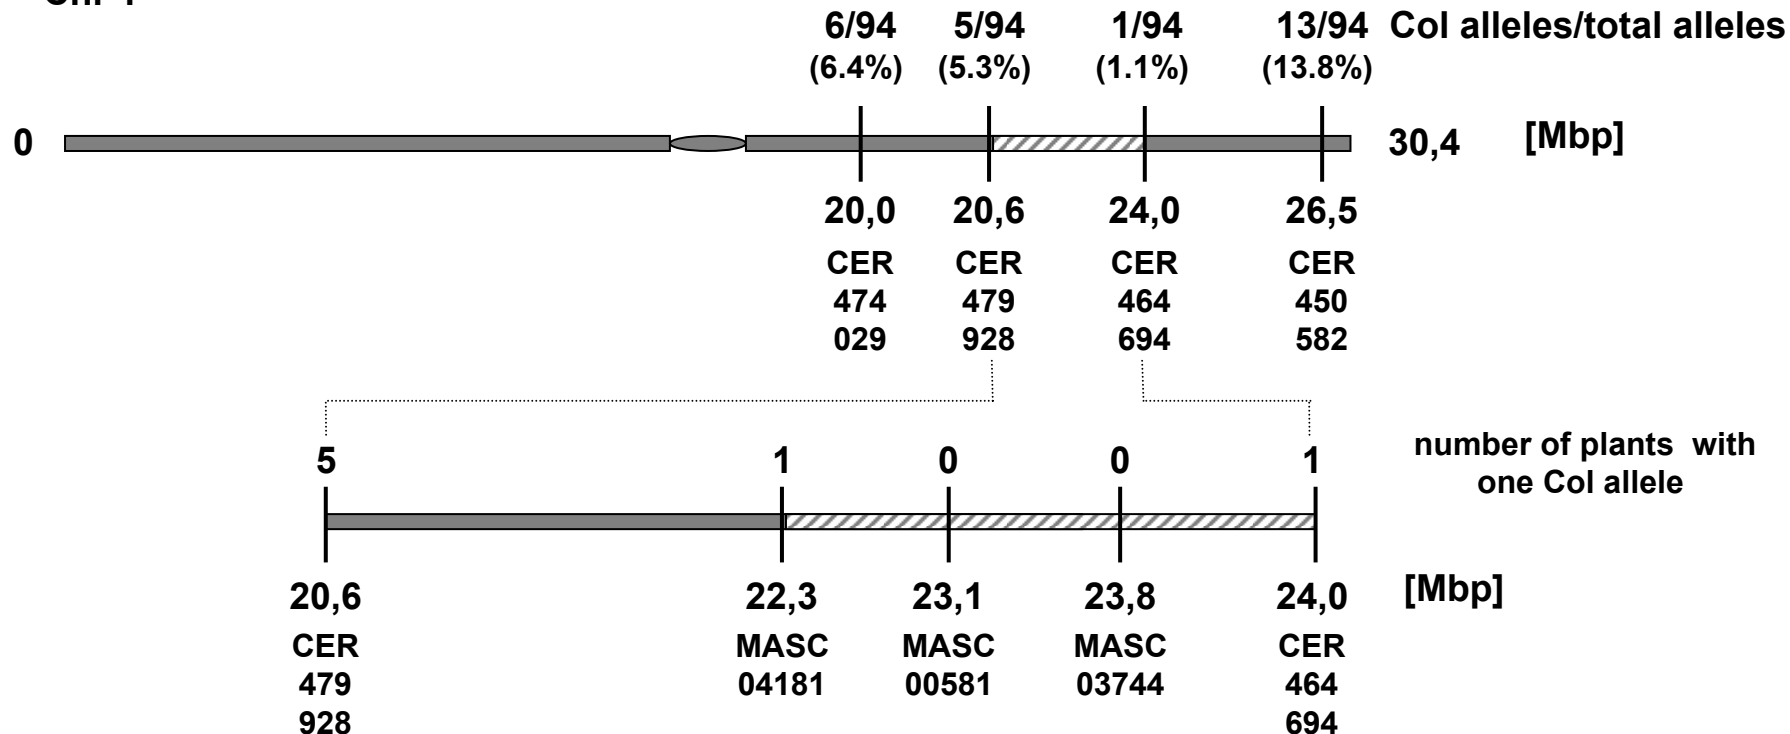

**Supplemental Figure S4:** Rough mapping of the *RPF2* locus on chromosome 1. 47 of 48 plants showing the recessive *C24 nad9* 5' end phenotype (i.e. undetectable *nad9* -202 5' ends in a single CR-RT-PCR) were used to map the *RPF2* locus. In the first round only markers located on chromosome 1 showed clear co-segregation with this phenotype (upper part of the schema) defining an initial interval of 3.4 Mbp between markers CER479928 and CER464694. Further fine mapping of plants heterozygous for these markers narrowed down this genomic region containing *RPF2* to approximately 1.7 Mbp. For all markers on the other chromosomes an about equal distribution between *C24* and *Col* alleles was found. The defined interval contains 442 protein coding genes ranging from At1g60470 to At1g64620 including 23 PPR genes. Markers are given in Supplemental Table S1.

**Supplemental Figure S5:** CR-RT-PCR analyses of mitochondrial mRNA extremities in PPR T-DNA insertion mutants. Numbering of the mutants and the respective AGI numbers are given below. Oligonucleotides used for cDNA synthesis and PCRs as well as product sizes expected from previous analyses are given in the right margin (Forner et al., 2007; Forner et al., 2008). Oligonucleotide sequences are listed in Supplemental Table 2. Sizes of DNA marker molecules are given in bp.

| lane | mutant        | gene        |
|------|---------------|-------------|
| 1    | SALK_061670   | (At1g62590) |
| 2    | SALK_020638   | (At1g63080) |
| 3    | SALK_146198   | (At1g62670) |
| 4    | SALK_139736   | (At1g62680) |
| 5    | SALK_022264C  | (At1g64100) |
| 6    | SALK_020230   | (At1g63130) |
| 7    | SAIL_1282_C03 | (At1g63230) |
| 8    | SALK_128068   | (At1g63070) |
| 9    | SALK_087235   | (At1g64580) |

atp1

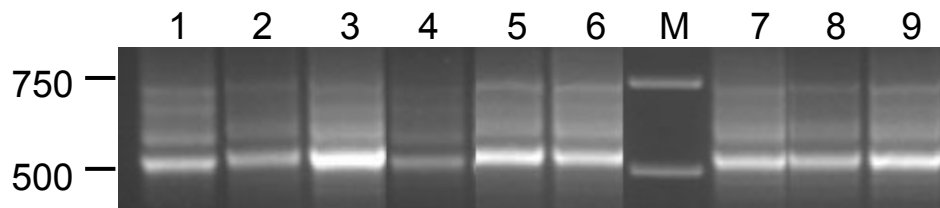

cDNA synthesis: Atatp1-3  
 PCR: Atatp1-8, Atatp1-9  
 expected PCR products: 532, 675, 769 bp

### atp6-1

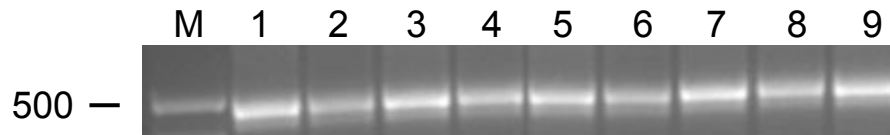

cDNA synthesis: Atatp6-1-NS.R  
PCR: Atatp6-3, Atatp6-2  
expected PCR product: 459 bp

### atp6-2:

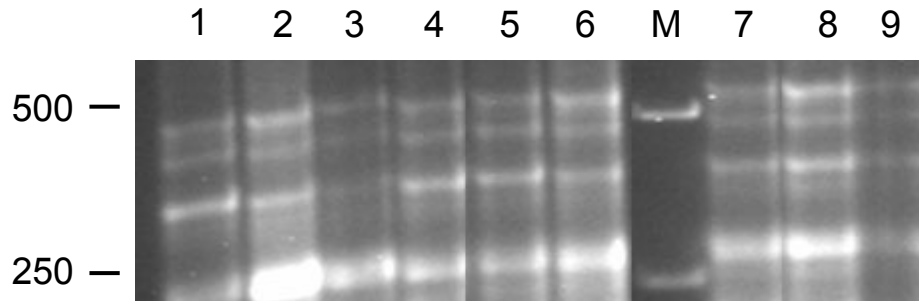

cDNA synthesis: random hexamer primers  
PCR: Atatp6-2.Mega.5', Atatp6.Mega.3'  
expected PCR products: 277, 296, 501 bp

### atp8 (orfB)

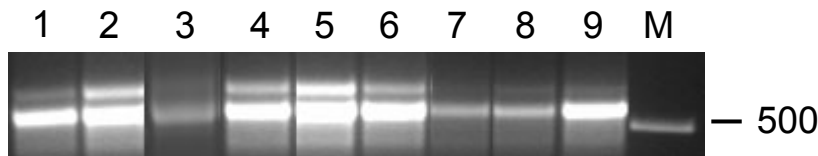

cDNA synthesis: Atatp8-pu2  
PCR: Atatp8-1, Atatp8-4  
expected PCR products: 528/599 bp

### atp9

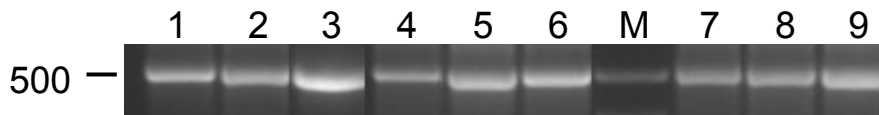

cDNA synthesis: Atatp9-14  
PCR: Atatp9-Mega5', Atatp9-Mega3'  
expected PCR product: 499 bp

### ccmB

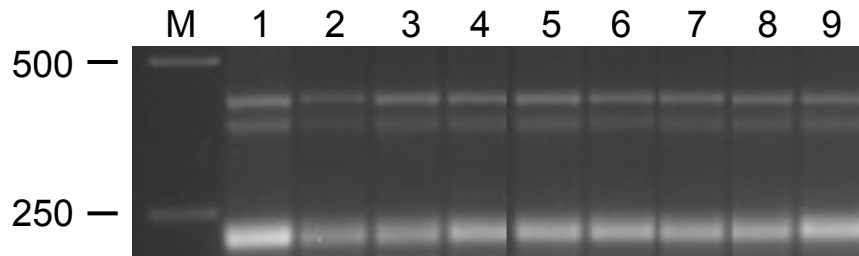

cDNA-Synthese: Atccb2-8  
PCR: Atccb2-Mega5', Atccb2-Mega3'  
expected PCR products: 190/398 bp

### ccmC:

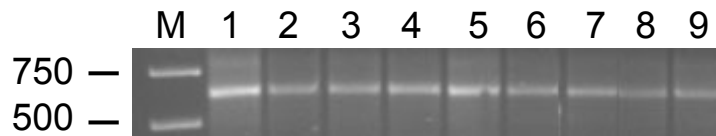

cDNA synthesis: Atccb3-5  
PCR: Atccb3-1, Atccb3-3  
expected PCR product: 634 bp

### ccmF<sub>C</sub>

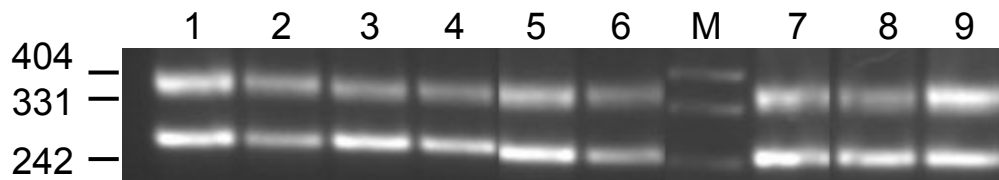

cDNA synthesis: Atccb6-2  
PCR: Atccb6-1, Atccb6-3  
expected PCR products: 249/354 bp

### ccmF<sub>N1</sub>

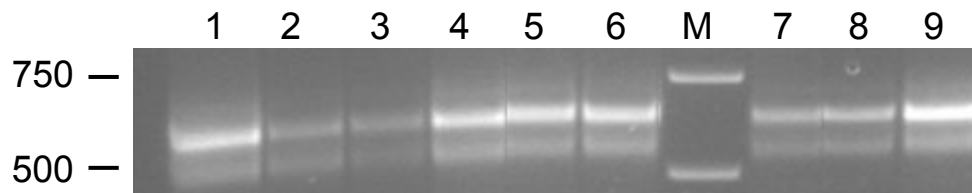

cDNA synthesis: Atccb6n1-1  
PCR: Atccb6n1-Mega5', Atccb6n1-Mega3'  
expected PCR products: 635/718 bp

### ccmF<sub>N2</sub>

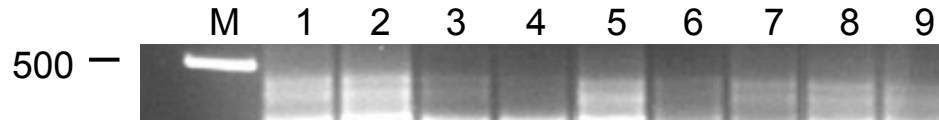

cDNA synthesis: Atccb6n2-1  
PCR: Atccb6n2-5, Atccb6n2-6  
expected PCR product: 450 bp

### COX1

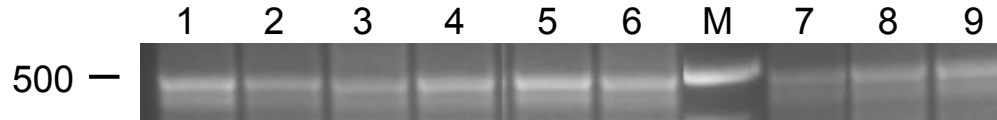

cDNA synthesis: Atcox1-1  
PCR: Atcox1-2, Atcox1-4  
expected PCR product: 490 bp

### COX2

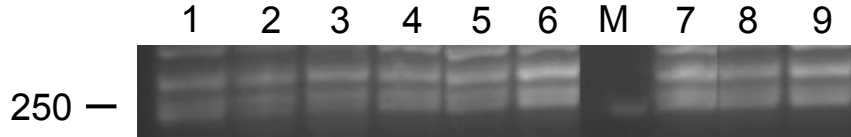

cDNA-Synthese: random hexamer primers  
PCR: Atcox2-5, Atcox2-6  
expected PCR products: 261/315 bp

### COX3

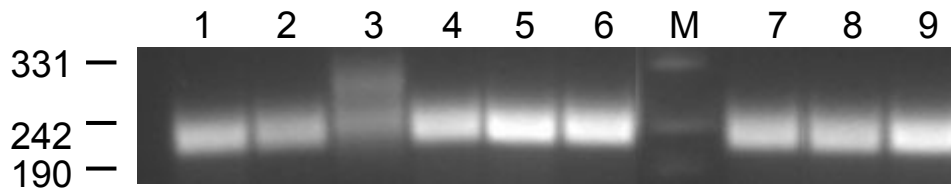

cDNA synthesis: Atcox3-3'-Primersonde  
PCR: Atcox3-Mega5', Atcox3-Mega3'  
expected PCR product: 232 bp



### nad1

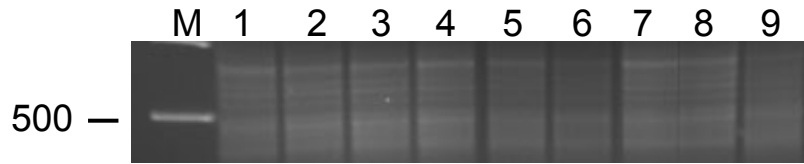

cDNA synthesis: Atnad1a-2  
PCR: Atnad1a-Mega5', Atnad1de-Mega3'  
expected PCR products: 475, 681, 971 bp

### nad2

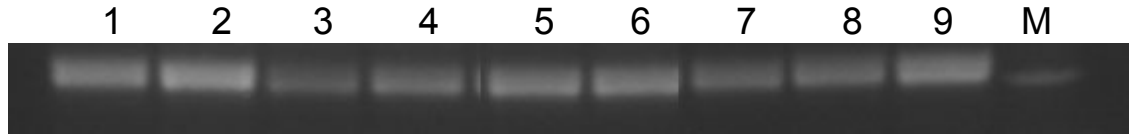

cDNA synthesis: Atnad2ab-1  
PCR: Atnad2ab-2, Atnad2cde-3  
expected PCR product: 336 bp

### nad3/rps12

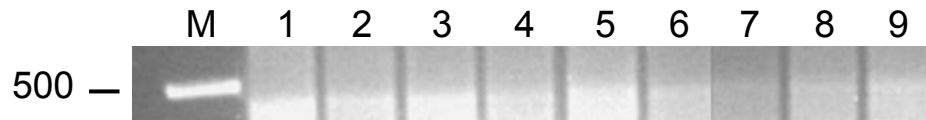

cDNA synthesis: Atnad3-1  
PCR: Atnad3-5, Atrps12-6  
expected PCR product: 474 bp

### nad4

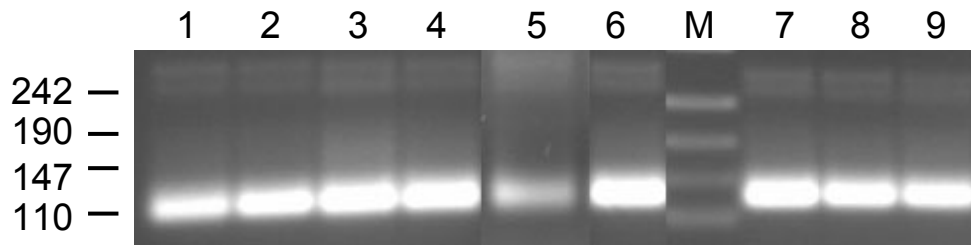

cDNA synthesis: Atnad4-5  
PCR: Atnad4-3, Atnad4-15  
expected PCR products: 125, 287 bp

### nad4L-ORF25

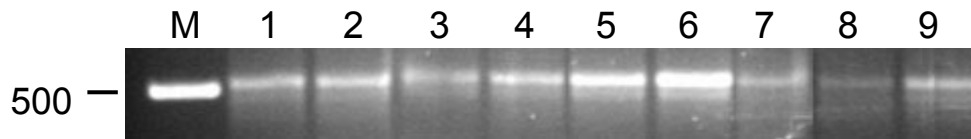

cDNA synthesis: Atnad4L-1  
 PCR: Atnad4L-2, Atnad25-3  
 expected PCR products: 514/490 bp

### nad5

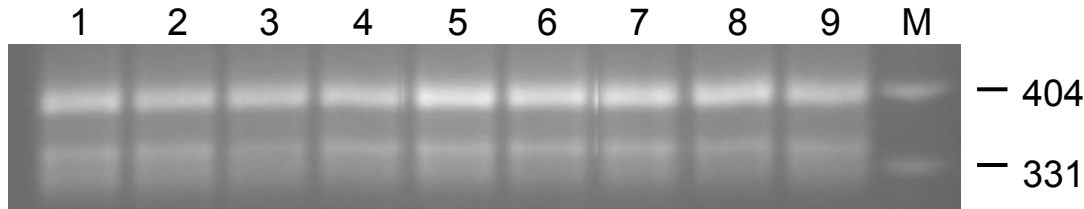

cDNA synthesis: Atnad5ab-1  
 PCR: Atnad5ab-2, Atnad5de-4  
 expected PCR products: 357, 408 bp

### nad6

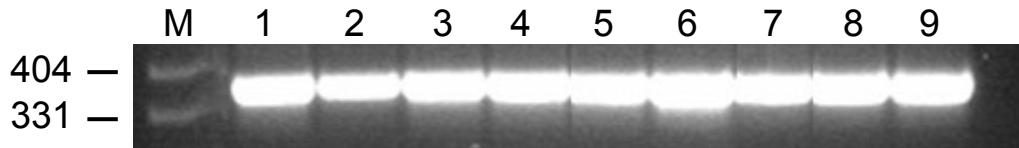

cDNA synthesis: Atnad6-1  
 PCR: Atnad6-2, Atnad6-4  
 expected PCR product: 363 bp

### nad7

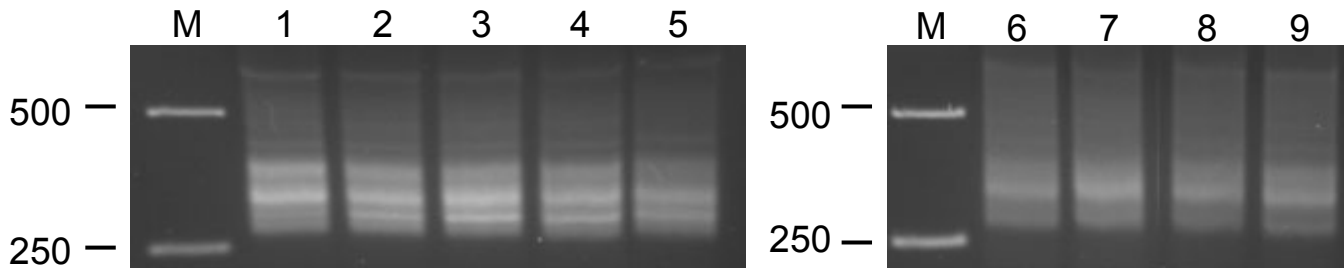

cDNA synthesis: Atnad7-2  
 PCR: Atnad7-7, Atnad7-8  
 expected PCR products:  
 338, 379, 645 bp

### nad9

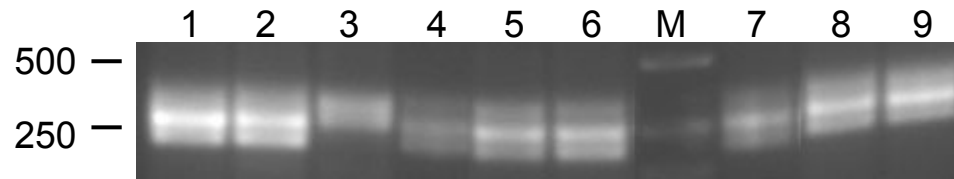

cDNA-Synthese: Atnad9-1  
PCR: Atnad9-3, Atnad9-7  
expected PCR products: 217, 258 bp

### rpl2-orfx

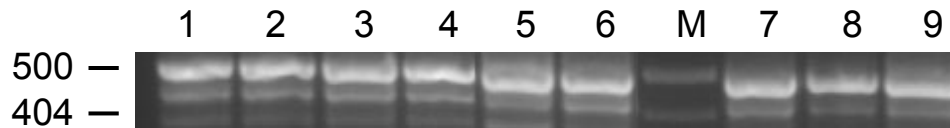

cDNA synthesis: Atrpl2-3  
PCR: Atrpl2-2, Atorfx-3  
expected PCR product: 429 bp

### rpl5/cob

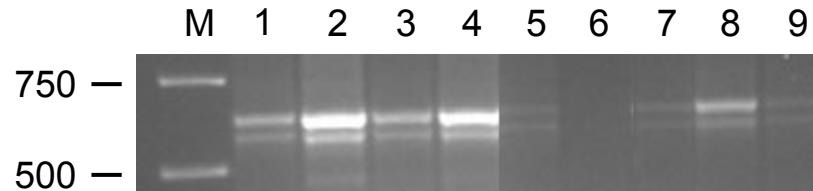

cDNA synthesis: Atrpl5-1  
PCR: Atrpl5-5, Atcob-3  
expected PCR products: 584/637 bp

### rps3-rpl16

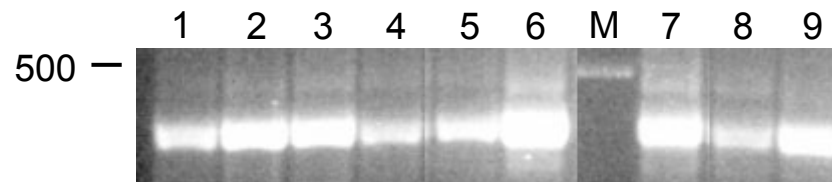

cDNA-Synthese: Atrps3-1  
PCR: Atrps3-2, Atrpl16-3  
expected PCR products: 400 bp

### rps4

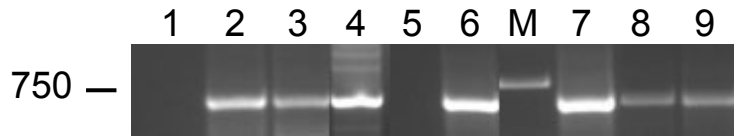

cDNA synthesis: random hexamer primers  
PCR: Atrps4-2, Atrps4-4  
expected PCR product: 678 bp

products obtained after PCR analysis with different primers:

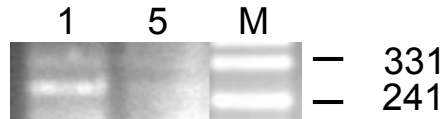

PCR (repetition): Atrps4-2/ Atrps4-6  
expected PCR product after repetition: 265 bp

### rps7

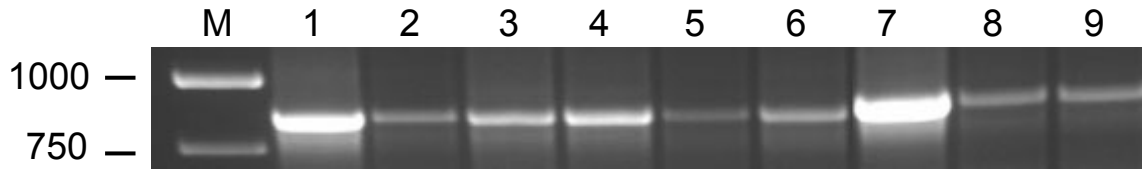

cDNA synthesis: Atrps7-2  
PCR: Atrps7-7, Atrps7-8  
expected PCR product: 863 bp

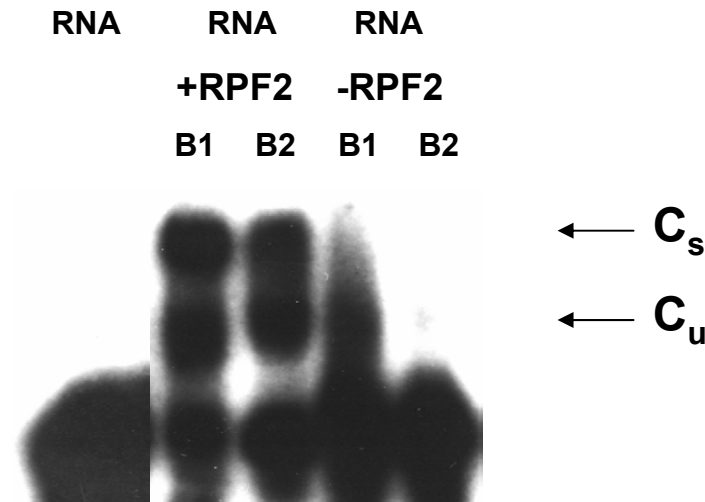

**Supplemental Figure S6.** Electrophoretic mobility shift assays (EMSA) performed with recombinant RPF2 and a synthetic *nad9* RNA (RNA) covering the -202 5' ends (-296 to -124). The formation of a specific complex ( $C_s$ ) was observed in two different buffer systems (+RPF2, B1 and B2). This complex was not seen in binding reactions performed with a control lysate obtained from *E. coli* expressing an empty pET32a vector (-RPF2). This result confirmed that the formation of  $C_s$  was specific for RPF2, while a smaller complex  $C_u$  was also formed in the control reactions.

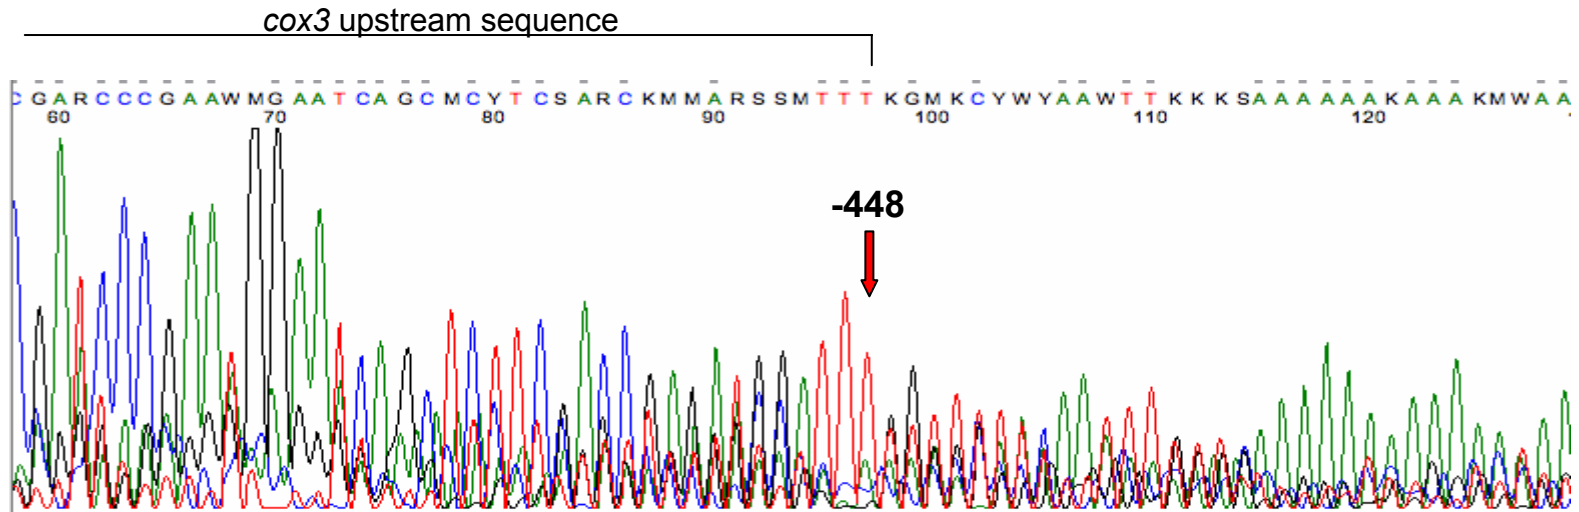

**Supplemental Figure S7:** Sequence analysis of the 300-bp PCR product obtained in the CR-RT-PCR analysis of *cox3* mRNAs with oligonucleotides *Atcox3*-Mega3' and *Atcox3*-Mega5'. Sequencing was done with primer *Atcox3*-Mega5'. Position -448, indicated by an vertical red arrow, is the last nucleotide position, which corresponds the *cox3* upstream sequence. This marks the 5' end of the *cox3* precursor RNA.

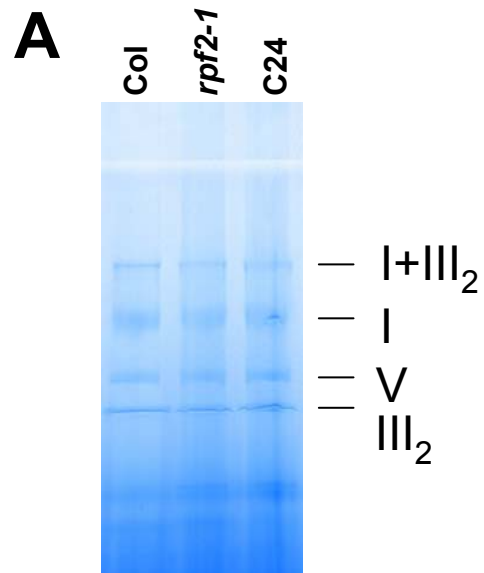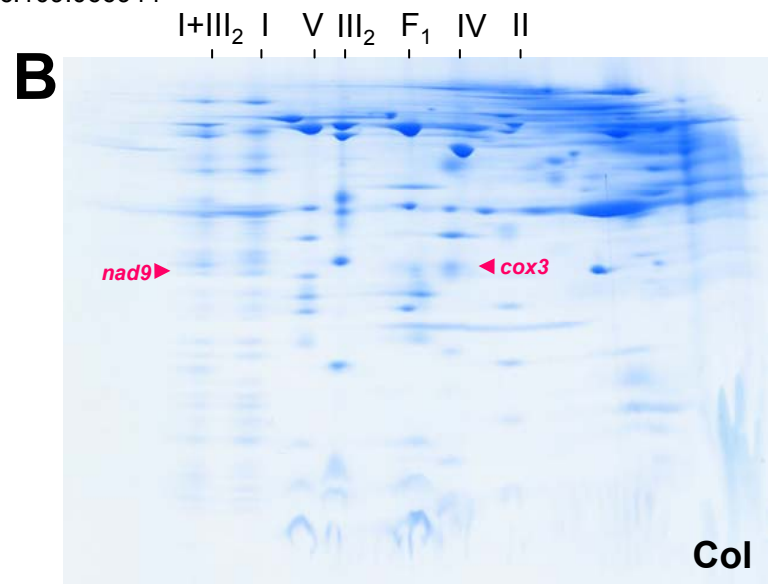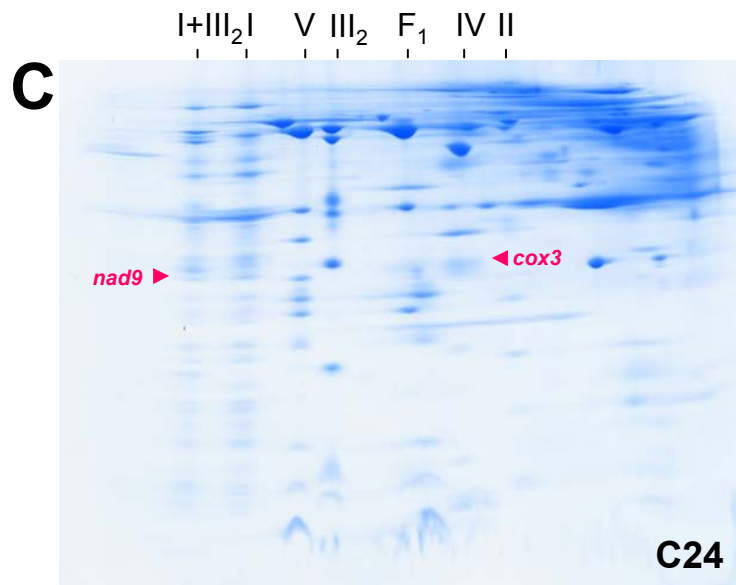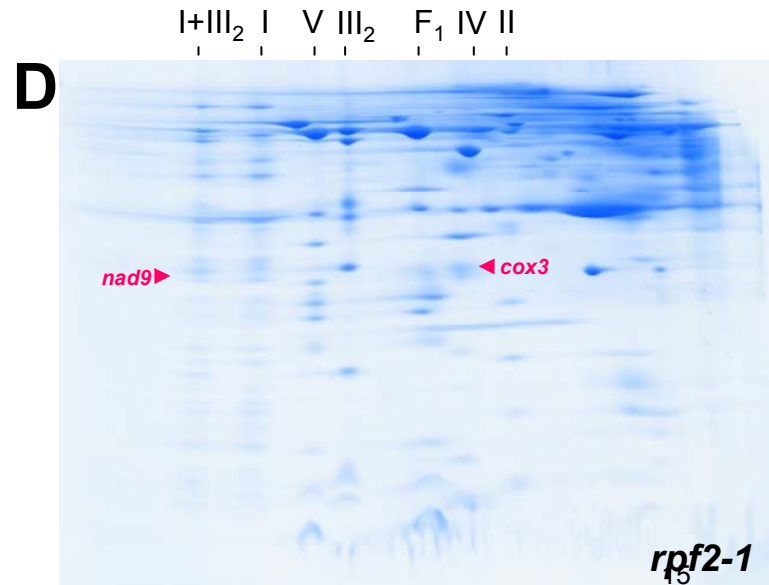

**Supplemental Figure S8:** Blue native (BN)/SDS polyacrylamide gel electrophoresis (PAGE) of mitochondrial protein from *Arabidopsis*. (A) About 1.0 mg of mitochondrial protein isolated from cell suspension cultures from accession Columbia (Col), from *rpf2-1* and from C24 were separated by blue native PAGE in the first dimension. (B to D) Lanes from the first dimension were cut from the gel and proteins subsequently separated by SDS PAGE in the second dimension. A comparison between the protein patterns from the different lines (B to D) did not reveal any differences in the abundance of *nad9* and *cox3* polypeptides (indicated by red arrow heads). Thus altered 5' processing of the corresponding mRNAs has no influence on the steady levels of these polypeptides. This result is consistent with the immunodetection analysis of the *nad9* protein (Fig. 5). Positions of different respiratory chain complexes are indicated.



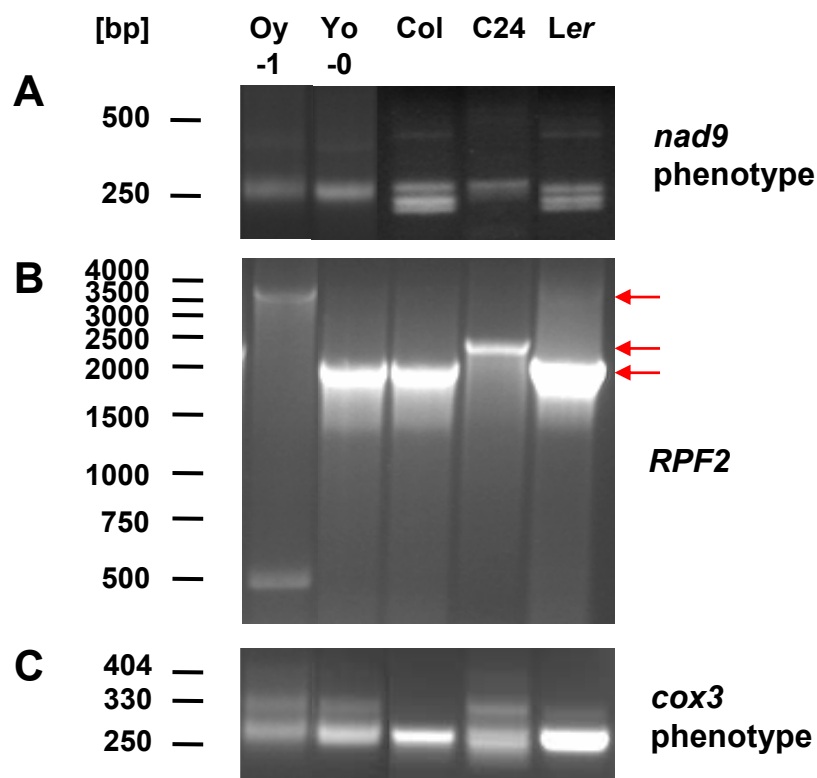

**Supplemental Figure S9:** Correlation of *nad9* and *cox3* mRNA 5' end phenotypes with the *RPF2* genotype. Accessions Oystese-1 (Oy-1) and Yosemite-0 (Yo-0) showing the C24 *nad9* 5' end phenotype (A, absence of -202 5' ends) were analyzed in respect to the *RPF2* genotype (B) and the *cox3* 5' end phenotype (C). Both accessions showed major *cox3* 5' ends at -380 and one or two additional *cox3* 5' ends at -448 or -540. PCR products of 3.7, 2.4 and 2.0 kb (red arrows) indicated three *RPF2* genotypes defective in *nad9* and *cox3* processing. The PCR product from Yo-0 had the same size as the corresponding product from Col DNA (2.0 kb), while a 2.4 kb-product was obtained from C24. A PCR product of approximately 3.7 kb was amplified from Oy-1. Sequence analyses confirmed that these products were amplified from *RPF2* (see also Supplemental Figure 10 and 11). Nucleotide sequences are available in the data base.

### Col

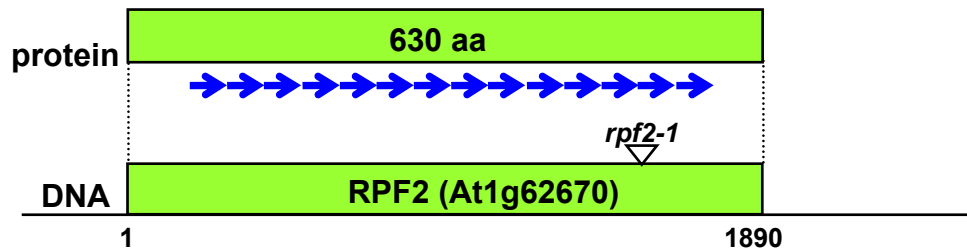

### C24

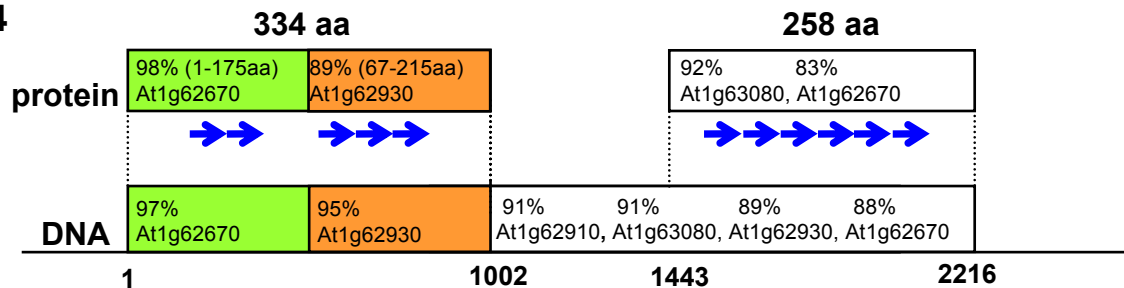

### Oy-1

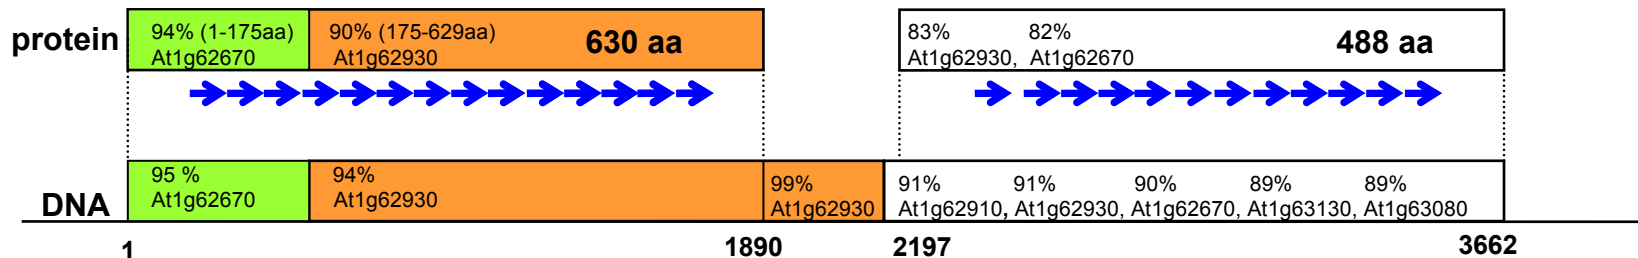

### Yo-0

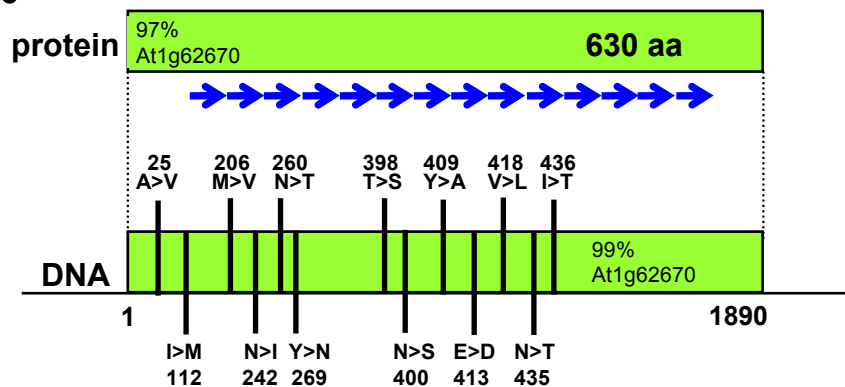

**Supplemental Figure S10:** *RPF2* (At1g62670) alleles in accessions Col, C24, Oy-1 and Yo-0. Nucleotide and amino acid sequence identities between *RPF2* from these accessions and different RF-like PPR genes from Col are given. The C-terminal parts of the *RPF2* alleles from C24 and Oy-1 correspond to different parts of At1g62930 (C24: 67-215; Oy-1: 175-630). Green boxes indicate highest similarity to *RPF2* (At1g62670), orange boxes represent regions with highest similarity to At1g62930 and white boxes stand for highest similarities to various RF-like PPR genes. Amino acid identities that are different between the *RPF2* alleles from Col and Yo-0 are indicated (Col > Yo-0), Their approximate positions are indicated by black vertical lines. Lengths of the proteins are given in amino acids (aa). Numbering refers to the first and last nucleotide position of the reading frame (without stop codon) and is given with respect to the ATG (A = +1) of the first reading frame. The T-DNA insertion in *rpf2-1* is indicated by a triangle. PPR repeats are given as blue arrows.

Col 62670 MRISFAIASTAKRFVHRSLVVRGNAATVSPSFSFFWRRAFSGKTSYDYREKLSRNLSEL 60  
 Yo-0 62670 MRISFAIASTAKRFVHRSLVVRGNVATVSPSFSFFWRRAFSGKTSYDYREKLSRNLSEL 60  
 Oy-1 62670 MRISFAIASTAKRFVHRSLVVRGNAATVSPSLSFFWRRAFSGKTSYDYREKLSRNLSEL 60  
 Col 62930 MTSCVHLGIVA SQSKKMSLAKR-FAQLRKASPLFSLRGVYFSAASYDYREKLSRNVLDDL 59  
 C24 62670N MRISFAIASTAKRFVHRSLVVRGNAATVSPSLSFFWRRAFSGKTSYDYREKLSRNLSEL 60  
 C24 62670C -----

→

Col 62670 KLDDAVALFGEMVKSRRPFPSSIIEFSKLLSAIAKMNKFDVVISLGEQMQLGIPHNNHYTYS 120  
 Yo-0 62670 KLDDAVALFGEMVKSRRPFPSSIIEFSKLLSAIAKMNKFDVVISLGEQMQLGMIPHNNHYTYS 120  
 Oy-1 62670 KLDDAVALFGEMVKSRRPFPSSIIEFSKLLSAIAKMNKFDVVISLGEQMQLGIPHNNHYTYS 120  
 Col 62930 KLDDAVDLFGEMVQSRPLPSIVEFNKLLSAIAKMNKFDLVISLGERMQNLRISYDLYSYN 119  
 C24 62670N KLDDAVALFGEMVKSRRPFPSSIIEFSKLLSAIAKMNKFDVVISLGEQMQLGIPHNNHYTYS 120  
 C24 62670C -----LFGEMVQSRPLPSIVEFNKLLSAIAKMNKFDLVISLGERMQNLRISYDLYSYN 228

→

Col 62670 ILINCFRRSQLPLALAVLGKMMKLGYPNIVTLSSLLNGYCHSKRISEAVALVDQMFVT 180  
 Yo-0 62670 ILINCFRRSQLPLALAVLGKMMKLGYPNIVTLSSLLNGYCHSKRISEAVALVDQMFVT 180  
 Oy-1 62670 ILINCFRRSQLPLALAVLGKMMKLGYPDIVTLSSLLNGYCHGKRISEAVALVDQMVEM 180  
 Col 62930 ILINCFRRSQLPLALAVLGKMMKLGYPDIVTLSSLLNGYCHGKRISEAVALVDQMFVM 179  
 C24 62670N ILINCFRRSQLPLALAVLGKMMKLGYPNIVTLSSLLNGYCHGKRISEAVALVD----- 175  
 C24 62670C ILINCFRRSQLPLALAVLGKMMKLGYPDIVTLNSSLNGFCHGNRISDAVALVDQMVEM 288

→

→

Col 62670 GYQPNTVTFNTLIHGLFLHNKASEAMALIDRMVAKGCQPDLVITYGVVNGLCKRGDIDL 240  
 Yo-0 62670 GYQPNTVTFNTLIHGLFLHNKASEAVALIDRMVAKGCQPDLVITYGVVNGLCKRGDIDL 240  
 Oy-1 62670 GYKPDVTFNTLIHGLFLHNKASEAVALIDRMVARGCQPDFLFTYGTVVNGLCKRGDIDL 240  
 Col 62930 EYQPNTVTFNTLIHGLFLHNKASEAVALIDRMVARGCQPDFLFTYGTVVNGLCKRGDIDL 239  
 C24 62670N -----  
 C24 62670C GYKPDVTFNTLIHGLFLHNKASEAVALMIEWLPEGVNQIWLLEW----- 334

→

→

Col 62670 FNLLNKMEQKLEPGVLIYNTIIDGLCKYKHMDALNLFKEMETKGI RPNVVITYSSLISC 300  
 Yo-0 62670 FI LLNKMEQKLEPGVLIYTTIIDGLCKNKHMDALNLFKEMETKGI RPNVVITYSSLISC 300  
 Oy-1 62670 LSLLKKMEKKGKIEANVVYIYNTIIDGLCKYKHMDAFDLFNKMETKGIKPDVFTYNSLISC 300  
 Col 62930 LSLLKKMEKKGKIEADVVIYTTIIDALCNYNVNDALNLFTEM DNKGI RPNVVITYNSLIR 299  
 C24 62670N -----  
 C24 62670C -----

→

Col 62670 LCNYGRWSDASRLSDMIERKINPDVFTFSALIDAFVKEGKLV EAEKLYDEMVKRSIDPS 360  
 Yo-0 62670 LCNYGRWSDASRLSDMIERKINPDVFTFSALIDAFVKEGKLV EAEKLYDEMVKRSIDPS 360  
 Oy-1 62670 LCNYGRWSDASRLSDMIERKINPVVTFNSLIDAF AKEGKLV EAEKLFDEM IQRSIDPN 360  
 Col 62930 LCNYGRWSDASRLSDMIERKINPVVTFNSLIDAFVKEGKLV EAEKLYDEM IKRSIDPD 359  
 C24 62670N -----  
 C24 62670C -----

```

Col 62670      IVTYSSLINGFCMHDRLDEAKQMFEMVSKHCFDPDVVYNTLIKGFCKYKRVEEGMEVFR 420
Yo-0 62670    IVTYSSLINGFCMHDRLDEAKQMFEMVSKHCFDPDVVSYSTLIKGFCKAKRVDDEGMELFR 420
Oy-1 62670    IVTYNSLINGFCMHDRLDEAQQIFFTLMVSKDCLPDVVYNTLIKGFCKAKRVEEGMELFR 420
Col 62930      IFTYSSLINGFCMHDRLDEAKHMFELMISKDCFPNVVYNTLIKGFCKAKRVEEGMELFR 419
C24 62670N    -----
C24 62670C    -----

                                →                                →

Col 62670      EMSQRGLVGNTVITYNILIQGLFQAGDCDMAQEIFKEMVSDGVPPNIMTYNTLLDGLCKNG 480
Yo-0 62670    EMSQRGLVGNTVITYTTLIQGLFQAGDCDMAQEIFKEMVSDGVPPNIMTYNTLLDGLCKNG 480
Oy-1 62670    EMSQRGLVGNTVITYNTLIQGLFQAGDCDMAQKIFKKMVS DGVPPDIITYSILLDGLCKYG 480
Col 62930      EMSQRGLVGNTVITYNTLIQGLFQAGDCDMAQKIFKKMVS DGVPPDIITYSILLDGLCKYG 479
C24 62670N    -----
C24 62670C    -----

                                →                                →

Col 62670      KLEKAMVVF EYLQ RSKMEPTIYTYNIMIEGMCKAGKVEDGWDLFCNLSLKGVKPDVVAYN 540
Yo-0 62670    KLEKAMVVF EYLQ RSKMEPTIYTYNIMIEGMCKAGKVEDGWDLFCNLSLKGVKPDVVAYN 540
Oy-1 62670    KLEKALVVFEYLQ RSKMEPTIYTYNIMIEGMCKAGKVEDGWDLFCSLSLKGVKPNVIIYT 540
Col 62930      KLEKALVVFEYLQ RSKMEPTIYTYNIMIEGMCKAGKVEDGWDLFCSLSLKGVKPNVIIYT 539
C24 62670N    -----
C24 62670C    -----

                                →

Col 62670      TMISGFRCRKGSK EEADALFKEMKEDGTL PNSGCYNTLIRARLRDGDREASAELIKEMRSC 600
Yo-0 62670    TMISGFRCRKGSK EEADALFKEMKEDGTL PNSGCYNTLIRARLRDGDREASAELIKEMRSC 600
Oy-1 62670    TMISGFRCRKG LKEEADALFR EMKEDGTL PDSGCYNTLIRARLRDGDKAASAELIKEMRSC 600
Col 62930      TMISGFRCRKG LKEEADALFR EMKEDGTL PNSGT YNTLIRARLRDGDKAASAELIKEMRSC 599
C24 62670N    -----
C24 62670C    -----

Col 62670      GFAGDASTIGLVTNMLHDGRLDKSFLDMLS 630
Yo-0 62670    GFAGDASTIGLVTNMLHDGRLDKSFLDMLS 630
Oy-1 62670    GFVGDASTI SMVINMLHDGRL EKSYLEMLS 630
Col 62930      GFVGDASTI SMVINMLHDGRL EKSYLEMLS 629
C24 62670N    -----
C24 62670C    -----

```

**Supplemental Figure S11: Alignment of amino acid sequence deduced from the *RPF2* alleles (62670) from accessions Col, Yo-0, Oy-1 and C24 and from the *At1g62930* gene (62930) from Col. Amino acid identities differing between the distinct *RPF2* alleles are highlighted in blue, amino acid residues that are different between *At1g62930* and *RPF2* are given in red. Blue arrows above the sequences mark the starts of PPR repeats.**

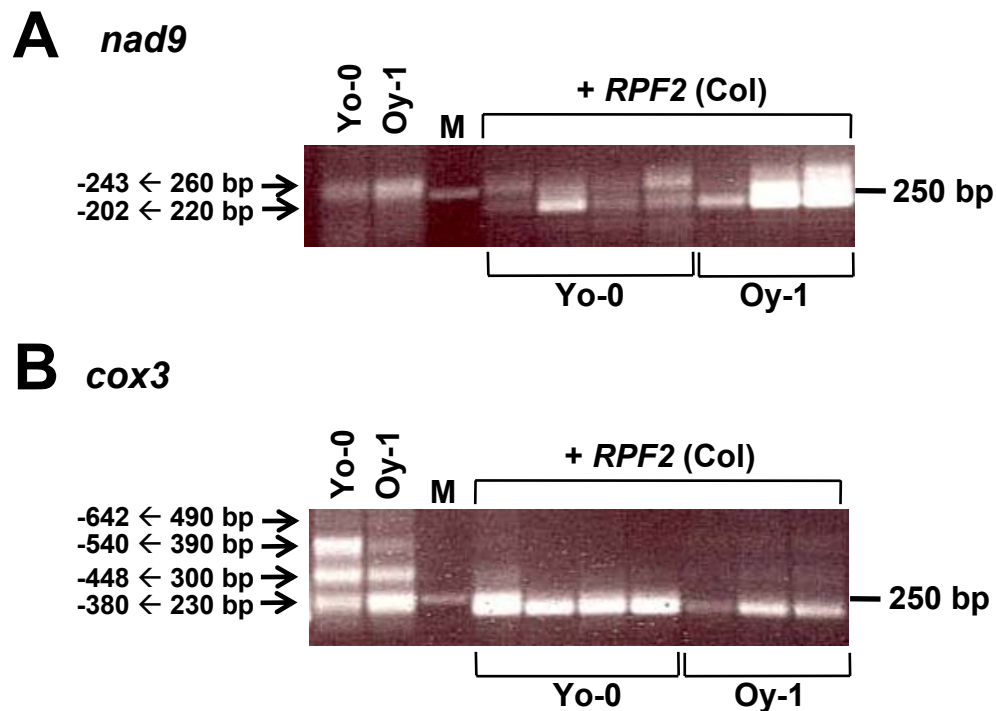

**Supplemental Figure S12:** Complementation studies of *Arabidopsis* accessions Yosemite-0 (Yo-0) and Oystese-1 (Oy-1). The introduction of the Col *RPF2* gene (+*RPF2*) into these accessions resulted in the generation of *nad9* -202 5' ends (A) and in efficient processing of *cox3* mRNAs (B). These results together with the incapability of the *RPF2* alleles from Oy-1 and Yo-0 to restore the *nad9* and *cox3* mRNA processing phenotypes in *rpf2-1* plants (data not shown) demonstrate that these alleles are defective in 5' processing of these mitochondrial mRNAs.

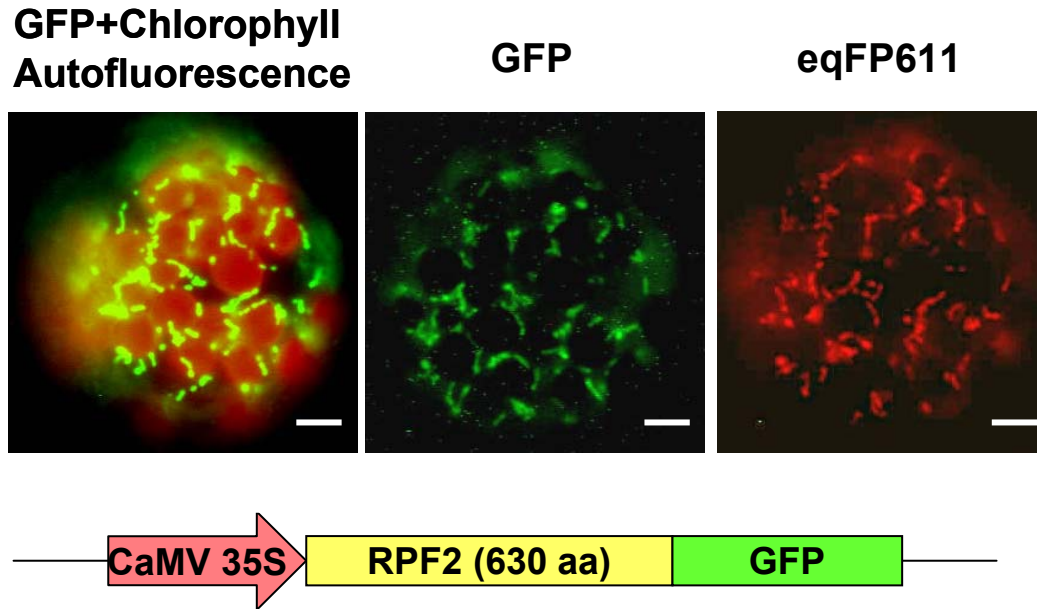

**Supplemental Figure S13:** RPF2 is a mitochondrial protein. A fusion protein consisting of the complete RPF2 (630 amino acids) and the green fluorescent protein (GFP) is transiently expressed in transgenic tobacco protoplasts. Fluorescence of GFP and chlorophyll, GFP alone and the red fluorescence protein from the sea anemone *Entacmaea quadricolor* (eqFP611) are visualized through different filter sets. eqFP611 C-terminally fused to the N-terminal part of the mitochondrial isovaleryl-CoA dehydrogenase has been previously established as mitochondrial marker in transgenic tobacco (Forner and Binder, 2007). The fluorescence pattern is typical for a localization of the RFP2:GFP fusion protein in mitochondria, as shown in Fig. 6. No fluorescence of the full-length RFP2:GFP is found in chloroplasts. Bars = 10 μm.

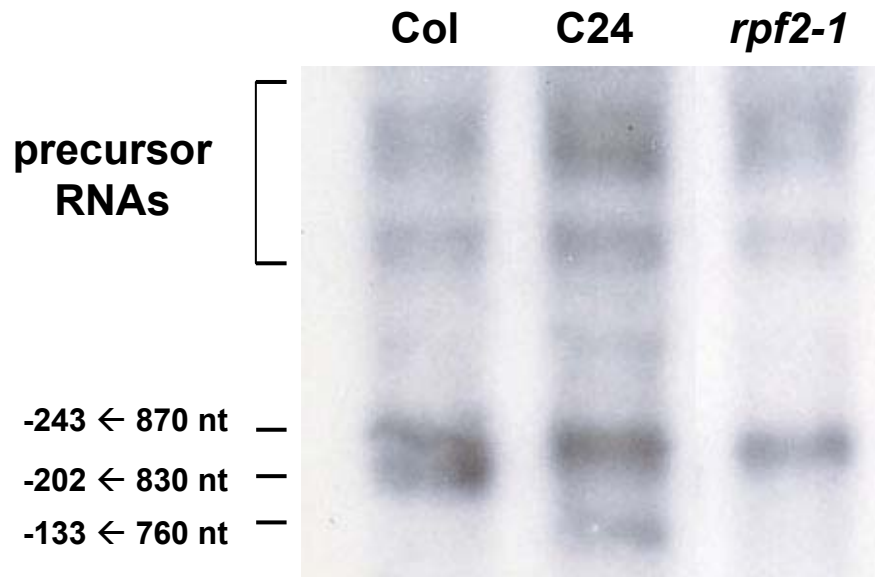

**Supplemental Figure S14:** Northern blot analysis of *nad9* transcripts in Col, C24 and *rpf2-1* plants. The lack of the 830-nucleotide mRNA with the -202 5' ends in C24 and *rpf2-1* is not accompanied by an increase in larger precursor RNAs.



**Supplemental Table S1:**Genetic markers used for mapping of the *RPF2* locus in *Arabidopsis*

| <b>Marker</b> | <b>Chromosome</b> | <b>PCR product length Col/C24 [bp]</b> | <b>location on chromosomes</b> | <b>percentage of C24 alleles in F2 hybrids [%]</b> |
|---------------|-------------------|----------------------------------------|--------------------------------|----------------------------------------------------|
| CER479928     | 1                 | 190/170                                | 20,610,106 to 20,610,048       | 94.7                                               |
| CER449403     | 2                 | 230/187                                | 1,830,693 to 1,830,736         | 56.4                                               |
| CER458621     | 2                 | 206/160                                | 5,395,955 to 5,395,990         | 57.4                                               |
| CER449629     | 2                 | 559/499                                | 12,664,598 to 12,664,665       | 59.6                                               |
| CER464947     | 3                 | 347/300                                | 3,108,758 to 3,108,804         | 45                                                 |
| CER470109     | 3                 | 183/150                                | 22,754,153 to 22,754,187       | 50                                                 |
| CER460528     | 4                 | 279/140                                | 5,742,442 to 5,742,487         | 44.7                                               |
| CER456657     | 5                 | 633/535                                | 5,938,730 to 5,938,828         | 55.3                                               |
|               |                   |                                        |                                |                                                    |
| CER464694     | 1                 | 238/207                                | 24,013,992 to 24,014,023       | 98.9                                               |
| CER474029     | 1                 | 230/200                                | 20,018,769 to 20,018,799       | 93.6                                               |
| CER450582     | 1                 | 226/194                                | 26,464,219 to 26,464,250       | 88.3                                               |
|               |                   |                                        |                                |                                                    |
| MASC04181     | 1                 | SNP T → C                              | 22,279,931                     | 1                                                  |
| MASC00581     | 1                 | SNP A → G                              | 23,053,433                     | 0                                                  |
| MASC03744     | 1                 | SNP A → G                              | 23,824,203                     | 0                                                  |

Oligonucleotide sequences are given in Supplemental Table S2.

## Oligonucleotide sequences

| Oligonucleotide       | Sequence (5' to 3')                              |
|-----------------------|--------------------------------------------------|
| Atnad9-1              | agagggatcatcaactccgc                             |
| Atnad9-2              | cttgggtaaagtctccaac                              |
| Atnad9-3              | cgattttgctagtccttggg                             |
| Atnad9-7              | ttgtccaaccaagaaaggc                              |
| Atnad9-NS.H           | atggataaccaattcatttc                             |
| Atnad9-NS.R           | ttatccgctcgctacgctg                              |
| Atnad9-EMSA.H         | ggtcgagttaagtaaagactggttacc                      |
| Atnad9-EMSA.R         | taatacgactcactataggggagctgtctagggcatc            |
| Atatp9-2              | ttgcaccttaacatctcg                               |
| Atcox3-2              | gagtgaacccgaaataggcc                             |
| Atcox3-23             | gatctatcgagtaaccaggaaagag                        |
| Le-cox3-HindIII.H     | atataagctttccataggcttggccctag                    |
| Le-cox3-HindIII.R     | ctaagaagcttcgaataccctttaccaag                    |
| Atcox3-3'Primersonde  | cgactttggtatgatgcct                              |
| Atcox3-Mega3'         | cacataaatgaaggaatcgaagagattatggcag               |
| Atcox3-Mega5'         | aacggagacaccaattaaggaacgcac                      |
| Atcox3-5'-Primersonde | gattgaatctcagaggcattc                            |
| Atcox3-3'-Primersonde | cgactttggtatgatgcct                              |
| At1g62670.H           | ggttgaattttacagagctccgaatcagagagc                |
| At1g62670.R           | gatatggtttgctcgactattctctcgactcaagg              |
| At1g62670-Kompl.H     | atgcagtcgagcggcgcgcttgaattgttactgtgtttgtcattcccc |
| At1g62670-Kompl.R     | tgactccgaggcttaattaattccagcacctgatgagttttctcatcc |
| At1g62670-Kompl.H3    | ttcacaagtaccgggctatgaggatcgtttgcgattgc           |
| At1g62670-Kompl.R5    | tgactccgaggcttccgggggaaggaaggacgagacttg          |

|                    |                                                  |
|--------------------|--------------------------------------------------|
| At1g62670-Kompl.R3 | tgactccgaggcttcccgggcaagaaagcatatcgaggaagct      |
| At1g62670UEX.H2    | atgcagtcgagcggatccggtaatgctgcaactgtttctcc        |
| At1g62670UEX.R     | gacttagagtttctgcagttaagaaagcatatcgaggaagcttttctc |
| Atccb2-8           | aaaggtgcaggaggaaaagg                             |
| Atccb2-Mega5'      | gccgcgtaacatcatcttcaaccaacc                      |
| Atccb2-Mega3'      | gttcgtatctcttttccaatttcggctcga                   |
| Atrp15-1           | cacacaatccaggaacttcc                             |
| Atrp15-5           | tttgagcaacagatcttgacg                            |
| Atcob-3            | attctgggacgagttggaag                             |
| Atatp6-1-NS.R      | ttatatccgccctgtcccac                             |
| Atatp6-3           | accggacgcttgaccactag                             |
| Atatp6-2           | ggcttgggaattaggtgtagc                            |
| Atatp8-pu2         | tacaccattgggatacttcg                             |
| Atatp8-1           | gtactccatctccatcattgc                            |
| Atatp8-4           | agtggctcacgaggaatgg                              |
| Atnad7-2           | tatgtggtccgcacgttcc                              |
| Atnad7-7           | tgcacctaaaggagaatttgggtctttctgg                  |
| Atnad7-8           | tttaatttgccttttctagtcgcatggg                     |
| Atrp12-2           | gtctaagtgtcttctctc                               |
| Atrp12-3           | gaggaagtgtcttcttctcag                            |
| AtorfX-3           | cacagctgtcttttccacac                             |
| Atnad4-3           | gactgcatgcatacatccg                              |
| Atnad4-5           | ttgtatccgaggaacaggag                             |
| Atnad4-15          | aacccttcccgtgtatagc                              |
| Atatp9-14          | agagcaaagcccaaaatgg                              |
| Atatp9-Mega.5'     | agagcaaagcccaaaatggcataacc                       |
| Atatp9-Mega.3'     | gccccaatgatggccttttctgattattcg                   |

|                    |                                   |
|--------------------|-----------------------------------|
| Atrps7-2           | gcttatattctctacggcg               |
| Atrps7-7           | atcaatagttttgctccacatccaagccc     |
| Atrps7-8           | gaagtttcgcgcatctcagatgggtgg       |
| Atcox1-1           | cccaccaagaatttgatcg               |
| Atcox1-2           | tacgaatcagtagtgaagaagc            |
| Atcox1-4           | gaatggatggtagaaagtcc              |
| Atnad2ab-1         | accacattactggctaacg               |
| Atnad2ab-2         | aaagatctctggggaaaccg              |
| Atnad2cde-3        | gtcgttactactagcaatgac             |
| Atnad1a-2          | gtaacaatccgaacgatccc              |
| Atnad1a-Mega.5'.B  | ttccaagtatttcagctggaacagctatgtaca |
| Atnad1de-Mega.3'.B | tggcttttagtcacctttcaatggcttcc     |
| Atatp1-3           | caatcccactccaactgag               |
| Atatp1-8           | ttcgcgtaaaagttcctaattcgactttcg    |
| Atatp1-9           | gcagctgtcaatggattctgtgatcg        |
| Atatp6-2.Mega5'    | taatatatccggcctgaatcactccctcg     |
| Atatp6.Mega3'      | tcttgattaaccggctggaattaggtg       |
| Atnad3-1           | aaacgacttctggcatcacc              |
| Atnad3-5           | aaggatcgaaccacattcgtaggcc         |
| Atrps12-6          | aggagtaaaggatttgatgggaattccgg     |
| Atccb6n2-1         | ttcgaattgggttctgggtcc             |
| Atccb6n2-5         | tcctgatcagagaccactgtgttcgc        |
| Atccb6n2-6         | agcaggcatcgggtccgtagaacg          |
| Atccb3-5           | caataatactcatccgagcc              |
| Atccb3-Mega3'nah   | tgggagcattagccgatttggtacatc       |
| Atccb3-Mega5' nah  | cttgtgcgtggcactccttgct            |
| Atccb6n1-1         | caaaatgcaagtgtgcacc               |
| Atccb6n1-Mega.5'   | tgtaagtgaatgcaacgaaaagaccaga      |

|                  |                                 |
|------------------|---------------------------------|
| Atccb6n1-Mega.3' | agcgagaagccactcgactaaaaggctactg |
| Atnad5ab-1       | ttccgatgagatccatggag            |
| Atnad5ab-2       | atgaaacgcacgtagtggtc            |
| Atnad5de-4       | tgcccttgcaatgttacttgg           |
| Atnad4L-1        | agctgccaccgttagaacc             |
| Atnad4L-2        | aggaggattcccaaatacc             |
| Atorf25-3        | tcattcgagagagcttgggtg           |
| Atrps4-2         | ctctgttccgaacatttctg            |
| Atrps4-4         | taggtcatatccctcacgac            |
| Atnad6-1         | agtaaacctgaagtgtcgcg            |
| Atnad6-2         | gcacgtacaaccatcaaac             |
| Atnad6-4         | ttagtagccatgattggggc            |
| Atccb6-1         | catttcaatagtaggggtg             |
| Atccb6-2         | gaatagggcgacttgcctg             |
| Atccb6-3         | gagaaagttccgtggagtgc            |
| Atcox2-5         | aaggttccttcattttctgc            |
| Atcox2-6         | ttgtatggcaggaataccac            |
| Atrps3-1         | tacacctaccgagacgaaag            |
| Atrps3-2         | aaggtgagtctcataggtgg            |
| Atrp116-3        | ccaagtttgttcagtgggtcg           |
| CER479928.H      | cagttccaatgagcaatgtacacatgg     |
| CER479928.R      | ccttgttgatgtaaaatagttcgggttcc   |
| CER449403.H      | tgattccagcgggtaggcatgacc        |
| CER449403.R      | cgaaacattcaaaaagtggttatgggagag  |
| CER449629.H      | ccaaaaggcaacatgaatgacatgg       |
| CER449629.R      | ttttggggttttgcagaaacatgg        |
| CER458621.H      | cagcctcattgcctgatgtcaagaatgc    |

|             |                                                     |
|-------------|-----------------------------------------------------|
| CER458621.R | cgggtgaatgggcagcatgg                                |
| CER464947.H | tttggttgcttgaagaacaaatgttatatcg                     |
| CER464947.R | cgtgctgtgtgcgcatgc                                  |
| CER470109.H | ttttgtgattctatggtggcatcagtg                         |
| CER470109.R | caaaccgtagtgcaaattagagcatagttcc                     |
| CER460528.H | caatgatttggtgggtcaagagtcaagac                       |
| CER460528.R | gcaaaagtcattacggacaatacacaacg                       |
| CER456657.H | ccttcagaatcaccaactgtggagtcc                         |
| CER456657.R | gaaagaaacatatgcatcaaatctacctcg                      |
| CER464694.H | tgagaaacatcatcggatggtgatagtacatcg                   |
| CER464694.R | gctcttagttggtgtaatgaatatgaaatcttagtcg               |
| CER474029.H | cccttgctgccttatatgcaattctgtc                        |
| CER474029.R | gcgcaagaaatttcatttctgctagcag                        |
| CER450582.H | ggttagtggaagttaatgtggtatctcacgatacg                 |
| CER450582.R | catctccgatgtatttgctaattgaggttatgg                   |
| MASC00581.H | ttttttggttatgtagctagcggttcttgattcaatgc              |
| MASC00581.R | gcctaaccgtttttctcactctctgctc                        |
| MASC04181.H | ggggtcagttacattactagc                               |
| MASC04181.R | gtacggttctcttccctta                                 |
| MASC03744.H | caattctctgataatctaattaaaagacaaaaaattacaataaaatttcga |
| MASC03744.R | tcgaattctaacatggttctccagaccac                       |
